# Supplementary material
Source: MDPI journal article supplement (https://www.mdpi.com/2079-6412/13/8/1405)
Supplement: s1 [file s1]

# Supplementary Materials: An Assessment of New Imidazol Derivatives and an Investigation of Their Corrosion-Reducing Characteristics for Carbon Steel in an HCl Acid Solution

Ahmed Fatah <sup>1</sup>, Nadia Timoudan <sup>2</sup>, Mohamed Rbaa <sup>3</sup>, Fouad Benhiba <sup>1,2,\*</sup>, Rachid Hsissou <sup>4</sup>, Zaki S. Safi <sup>5</sup>, Ismail Warad <sup>6</sup>, Abeer A. AlObaid <sup>7</sup>, Basheer M. Al-Maswari <sup>8</sup>, Amale Boutakiout <sup>2</sup>, Hassan Zarrok <sup>1</sup>, Brahim Lakhri <sup>3</sup>, Abdelkadir Bellaouchou <sup>2</sup>, Charafeddine Jama <sup>9</sup>, Fouad Bentiss <sup>9,10</sup>, Hassan Oudda <sup>1</sup> and Abdelkader Zarrouk <sup>2,\*</sup>

**Citation:** Fatah, A.; Timoudan, N.; Rbaa, M.; Benhiba, F.; Hsissou, R.; Safi, Z.S.; Warad, I.; AlObaid, A.A.; Al-Maswari, B.M.; Boutakiout, A.; et al. An Assessment of New Imidazol Derivatives and an Investigation of Their Corrosion-Reducing Characteristics for Carbon Steel in an HCl Acid Solution. *Coatings* **2023**, *13*, 1405. <https://doi.org/10.3390/coatings13081405>

Academic Editor: Yanxin Qiao

Received: 10 July 2023

Revised: 31 July 2023

Accepted: 3 August 2023

Published: 10 August 2023

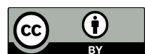

**Copyright:** © 2023 by the authors. Licensee MDPI, Basel, Switzerland. This article is an open access article distributed under the terms and conditions of the Creative Commons Attribution (CC BY) license (<https://creativecommons.org/licenses/by/4.0/>).

- <sup>1</sup> Laboratory of Advanced Materials and Process Engineering, Faculty of Sciences, Ibn Tofail University, P.O. Box 133, Kenitra 14000, Morocco; fataha47@gmail.com (A.F.); hzarrok@gmail.com (H.Z.); ouddahassan@gmail.com (H.O.)
- <sup>2</sup> Laboratory of Materials, Nanotechnology and Environment, Faculty of Sciences, Mohammed V University in Rabat, P.O. Box 1014, Rabat, Morocco; nadia.timoudan1995@gmail.com (N.T.); amale.boutakiout@gmail.com (A.B.); a.bellaouchou@um5r.ac.ma (A.B.)
- <sup>3</sup> Laboratory of Organic Chemistry, Inorganic, Electrochemistry, and Environment, Department of Chemistry, Faculty of Sciences, Ibn Tofail University, P.O. Box 133, Kenitra 14000, Morocco; mohamed.rbaa10@gmail.com (M.R.); b.lakhri2012@gmail.com (B.L.)
- <sup>4</sup> Laboratory of Organic Chemistry, Bioorganic and Environment, Chemistry Department, Faculty of Sciences, Chouaib Doukkali University, P.O. Box 20, El Jadida 24000, Morocco; r.hissou@gmail.com
- <sup>5</sup> Chemistry Department, Faculty of Science, Al Azhar University-Gaza, Gaza P.O. Box 1277, Palestine; zaki.safi@gmail.com
- <sup>6</sup> Department of Chemistry, AN-Najah National University, Nablus P.O. Box 7, Palestine; i.kh.warad@gmail.com
- <sup>7</sup> Department of Chemistry, College of Science, King Saud University, P.O. Box 2455, Riyadh 11451, Saudi Arabia; aalobaid@ksu.edu.sa
- <sup>8</sup> Department of Chemistry, Yuvaraja's College, University of Mysore, Mysuru 570005, India; basheer.al-maswari@gmail.com
- <sup>9</sup> Unité Matériaux et Transformations, CNRS UMR 8207, Université de Lille, F-59000 Lille, France; charafeddine.jama@centraledille.fr (C.J.); fbentiss@gmail.com (F.B.)
- <sup>10</sup> Laboratory of Catalysis and Corrosion of Materials, Faculty of Sciences, Chouaib Doukkali University, P.O. Box 20, El Jadida 24000, Morocco
- \* Correspondence: fouad.benhiba@uit.ac.ma (F.B.); azarrouk@gmail.com (A.Z.)

**Table S1.** Hirshfeld charges, condensed Fukui functions (in e units), local softness in e. eV<sup>-1</sup>, local electrophilicity (in e. eV) and condensed dual Fukui (in e), softness (in e.eV<sup>-1</sup>) and philicity (in e.eV) descriptors for the neutral TIMQ inhibitor obtained at B3LYP/6-31+G(d,p) in aqueous solution using PCM solvation model. Units "e" is the elementary charge.

| atom | q(N)    | q(N+1)  | q(N-1)  | f <sub>A</sub> <sup>+</sup> | f <sub>A</sub> <sup>-</sup> | f <sub>A</sub> <sup>2</sup> | s <sub>A</sub> <sup>+</sup> | s <sub>A</sub> <sup>-</sup> | Δs <sub>k</sub> | ω <sub>A</sub> <sup>+</sup> | ω <sub>A</sub> <sup>-</sup> | Δω <sub>k</sub> |
|------|---------|---------|---------|-----------------------------|-----------------------------|-----------------------------|-----------------------------|-----------------------------|-----------------|-----------------------------|-----------------------------|-----------------|
| O1   | -0.1972 | -0.2331 | -0.1905 | 0.0359                      | 0.0066                      | 0.0293                      | 0.0198                      | 0.0036                      | 0.0161          | 0.1460                      | 0.0268                      | 0.1191          |
| N1   | -0.2238 | -0.2309 | -0.1837 | 0.0071                      | 0.0401                      | -0.0331                     | 0.0039                      | 0.0221                      | -0.0182         | 0.0289                      | 0.1631                      | -0.1342         |
| N2   | -0.0017 | 0.0003  | 0.0217  | -0.0019                     | 0.0233                      | -0.0253                     | -0.0010                     | 0.0128                      | -0.0139         | -0.0077                     | 0.0947                      | -0.1025         |
| N3   | -0.1874 | -0.2926 | -0.1820 | 0.1052                      | 0.0054                      | 0.0998                      | 0.0579                      | 0.0030                      | 0.0549          | 0.4278                      | 0.0220                      | 0.4058          |
| C1   | 0.0746  | 0.0726  | 0.1383  | 0.0020                      | 0.0637                      | -0.0617                     | 0.0011                      | 0.0351                      | -0.0340         | 0.0081                      | 0.2590                      | -0.2509         |

|     |         |         |         |         |         |         |         |         |         |         |         |         |
|-----|---------|---------|---------|---------|---------|---------|---------|---------|---------|---------|---------|---------|
| C2  | -0.0020 | -0.0074 | 0.0772  | 0.0054  | 0.0791  | -0.0737 | 0.0030  | 0.0435  | -0.0406 | 0.0220  | 0.3216  | -0.2997 |
| C3  | 0.0155  | 0.0155  | 0.0990  | 0.0000  | 0.0835  | -0.0836 | 0.0000  | 0.0460  | -0.0460 | 0.0000  | 0.3395  | -0.3395 |
| C4  | -0.0028 | -0.0010 | 0.0049  | -0.0018 | 0.0077  | -0.0095 | -0.0010 | 0.0042  | -0.0052 | -0.0073 | 0.0313  | -0.0386 |
| C5  | -0.0346 | -0.0360 | -0.0146 | 0.0014  | 0.0200  | -0.0186 | 0.0008  | 0.0110  | -0.0102 | 0.0057  | 0.0813  | -0.0756 |
| C6  | -0.0349 | -0.0365 | -0.0130 | 0.0016  | 0.0219  | -0.0203 | 0.0009  | 0.0121  | -0.0112 | 0.0065  | 0.0891  | -0.0825 |
| C7  | -0.0377 | -0.0406 | -0.0192 | 0.0029  | 0.0185  | -0.0155 | 0.0016  | 0.0102  | -0.0086 | 0.0118  | 0.0752  | -0.0634 |
| C8  | -0.0375 | -0.0405 | -0.0183 | 0.0030  | 0.0192  | -0.0162 | 0.0017  | 0.0106  | -0.0089 | 0.0122  | 0.0781  | -0.0659 |
| C9  | -0.0373 | -0.0409 | -0.0045 | 0.0036  | 0.0328  | -0.0293 | 0.0020  | 0.0181  | -0.0161 | 0.0146  | 0.1334  | -0.1187 |
| C10 | -0.0103 | -0.0107 | 0.0157  | 0.0004  | 0.0260  | -0.0256 | 0.0002  | 0.0143  | -0.0141 | 0.0016  | 0.1057  | -0.1041 |
| C11 | -0.0481 | -0.0496 | -0.0135 | 0.0015  | 0.0346  | -0.0331 | 0.0008  | 0.0190  | -0.0182 | 0.0061  | 0.1407  | -0.1346 |
| C12 | -0.0510 | -0.0527 | -0.0142 | 0.0017  | 0.0368  | -0.0351 | 0.0009  | 0.0203  | -0.0193 | 0.0069  | 0.1496  | -0.1427 |
| C13 | -0.0464 | -0.0479 | -0.0213 | 0.0015  | 0.0251  | -0.0236 | 0.0008  | 0.0138  | -0.0130 | 0.0061  | 0.1021  | -0.0960 |
| C14 | -0.0467 | -0.0480 | -0.0194 | 0.0013  | 0.0272  | -0.0259 | 0.0007  | 0.0150  | -0.0143 | 0.0053  | 0.1106  | -0.1053 |
| C15 | -0.0491 | -0.0514 | 0.0032  | 0.0023  | 0.0523  | -0.0500 | 0.0013  | 0.0288  | -0.0275 | 0.0094  | 0.2127  | -0.2033 |
| C16 | -0.0126 | -0.0113 | -0.0045 | -0.0013 | 0.0081  | -0.0094 | -0.0007 | 0.0045  | -0.0052 | -0.0053 | 0.0329  | -0.0382 |
| C17 | -0.0412 | -0.0448 | -0.0213 | 0.0035  | 0.0199  | -0.0164 | 0.0019  | 0.0110  | -0.0090 | 0.0142  | 0.0809  | -0.0667 |
| C18 | -0.0379 | -0.0383 | -0.0214 | 0.0003  | 0.0166  | -0.0163 | 0.0002  | 0.0091  | -0.0090 | 0.0012  | 0.0675  | -0.0663 |
| C19 | -0.0400 | -0.0437 | -0.0255 | 0.0037  | 0.0145  | -0.0109 | 0.0020  | 0.0080  | -0.0059 | 0.0150  | 0.0590  | -0.0439 |
| C20 | -0.0381 | -0.0422 | -0.0239 | 0.0041  | 0.0142  | -0.0102 | 0.0023  | 0.0078  | -0.0056 | 0.0167  | 0.0577  | -0.0411 |
| C21 | -0.0390 | -0.0444 | -0.0129 | 0.0054  | 0.0261  | -0.0207 | 0.0030  | 0.0144  | -0.0114 | 0.0220  | 0.1061  | -0.0842 |
| C22 | 0.0132  | 0.0043  | 0.0197  | 0.0089  | 0.0065  | 0.0024  | 0.0049  | 0.0036  | 0.0013  | 0.0362  | 0.0264  | 0.0098  |
| C23 | -0.0168 | -0.0629 | -0.0182 | 0.0460  | -0.0014 | 0.0474  | 0.0253  | -0.0008 | 0.0261  | 0.1871  | -0.0057 | 0.1927  |
| C24 | -0.0070 | -0.0321 | -0.0056 | 0.0251  | 0.0014  | 0.0238  | 0.0138  | 0.0008  | 0.0130  | 0.1021  | 0.0057  | 0.0964  |
| C25 | 0.0272  | -0.0072 | 0.0306  | 0.0344  | 0.0035  | 0.0310  | 0.0189  | 0.0019  | 0.0170  | 0.1399  | 0.0142  | 0.1257  |
| C26 | 0.0715  | 0.0104  | 0.0794  | 0.0611  | 0.0079  | 0.0532  | 0.0336  | 0.0043  | 0.0293  | 0.2485  | 0.0321  | 0.2163  |
| C27 | -0.0626 | -0.1187 | -0.0561 | 0.0561  | 0.0065  | 0.0496  | 0.0309  | 0.0036  | 0.0273  | 0.2281  | 0.0264  | 0.2017  |
| C28 | -0.0335 | -0.0863 | -0.0271 | 0.0528  | 0.0064  | 0.0463  | 0.0291  | 0.0035  | 0.0255  | 0.2147  | 0.0260  | 0.1887  |
| C29 | -0.0204 | -0.1267 | -0.0198 | 0.1063  | 0.0006  | 0.1057  | 0.0585  | 0.0003  | 0.0582  | 0.4323  | 0.0024  | 0.4298  |
| C30 | -0.0381 | -0.1180 | -0.0321 | 0.0799  | 0.0060  | 0.0740  | 0.0440  | 0.0033  | 0.0407  | 0.3249  | 0.0244  | 0.3005  |
| C31 | 0.0224  | -0.0684 | 0.0270  | 0.0908  | 0.0046  | 0.0862  | 0.0500  | 0.0025  | 0.0475  | 0.3692  | 0.0187  | 0.3505  |

Table S2. As Table S1 but for the protonated form of TIMQ inhibitor.

| atom | q(N)    | q(N+1)  | q(N-1)  | $f_A^+$ | $f_A^-$ | $f_A^2$ | $s_A^+$ | $s_A^-$ | $\Delta s_k$ | $\omega_A^+$ | $\omega_A^-$ | $\Delta\omega_i$ |
|------|---------|---------|---------|---------|---------|---------|---------|---------|--------------|--------------|--------------|------------------|
| O1   | -0.1545 | -0.1803 | -0.1500 | 0.0258  | 0.0045  | 0.0213  | 0.0164  | 0.0029  | 0.0135       | 0.2073       | 0.0362       | 0.1711           |
| N1   | 0.0046  | 0.0007  | 0.0235  | 0.0039  | 0.0189  | -0.0150 | 0.0025  | 0.0120  | -0.0095      | 0.0313       | 0.1518       | -0.1205          |
| N2   | 0.0272  | 0.0294  | 0.0425  | -0.0022 | 0.0153  | -0.0175 | -0.0014 | 0.0097  | -0.0111      | -0.0177      | 0.1229       | -0.1406          |
| N3   | 0.0427  | -0.0418 | 0.0453  | 0.0846  | 0.0026  | 0.0820  | 0.0537  | 0.0017  | 0.0520       | 0.6797       | 0.0209       | 0.6588           |
| C1   | 0.1435  | 0.1417  | 0.1880  | 0.0018  | 0.0444  | -0.0426 | 0.0011  | 0.0282  | -0.0270      | 0.0145       | 0.3567       | -0.3423          |
| C2   | 0.0530  | 0.0484  | 0.1105  | 0.0045  | 0.0575  | -0.0530 | 0.0029  | 0.0365  | -0.0336      | 0.0362       | 0.4620       | -0.4258          |

|     |         |         |         |         |         |         |         |         |         |         |         |         |
|-----|---------|---------|---------|---------|---------|---------|---------|---------|---------|---------|---------|---------|
| C3  | 0.0438  | 0.0442  | 0.1043  | -0.0004 | 0.0605  | -0.0609 | -0.0003 | 0.0384  | -0.0387 | -0.0032 | 0.4861  | -0.4893 |
| C4  | -0.0058 | -0.0035 | 0.0151  | -0.0023 | 0.0209  | -0.0232 | -0.0015 | 0.0133  | -0.0147 | -0.0185 | 0.1679  | -0.1864 |
| C5  | -0.0275 | -0.0280 | -0.0029 | 0.0004  | 0.0246  | -0.0242 | 0.0003  | 0.0156  | -0.0154 | 0.0032  | 0.1976  | -0.1944 |
| C6  | -0.0266 | -0.0279 | -0.0022 | 0.0013  | 0.0244  | -0.0231 | 0.0008  | 0.0155  | -0.0147 | 0.0104  | 0.1960  | -0.1856 |
| C7  | -0.0283 | -0.0310 | -0.0057 | 0.0027  | 0.0226  | -0.0199 | 0.0017  | 0.0143  | -0.0126 | 0.0217  | 0.1816  | -0.1599 |
| C8  | -0.0280 | -0.0309 | -0.0026 | 0.0029  | 0.0255  | -0.0226 | 0.0018  | 0.0162  | -0.0143 | 0.0233  | 0.2049  | -0.1816 |
| C9  | -0.0245 | -0.0277 | 0.0197  | 0.0032  | 0.0442  | -0.0410 | 0.0020  | 0.0281  | -0.0260 | 0.0257  | 0.3551  | -0.3294 |
| C10 | -0.0056 | -0.0056 | 0.0369  | 0.0000  | 0.0425  | -0.0425 | 0.0000  | 0.0270  | -0.0270 | 0.0000  | 0.3415  | -0.3415 |
| C11 | -0.0320 | -0.0333 | 0.0084  | 0.0012  | 0.0404  | -0.0392 | 0.0008  | 0.0256  | -0.0249 | 0.0096  | 0.3246  | -0.3149 |
| C12 | -0.0348 | -0.0359 | 0.0017  | 0.0011  | 0.0364  | -0.0353 | 0.0007  | 0.0231  | -0.0224 | 0.0088  | 0.2925  | -0.2836 |
| C13 | -0.0318 | -0.0330 | -0.0015 | 0.0012  | 0.0303  | -0.0291 | 0.0008  | 0.0192  | -0.0185 | 0.0096  | 0.2434  | -0.2338 |
| C14 | -0.0320 | -0.0331 | 0.0051  | 0.0011  | 0.0371  | -0.0360 | 0.0007  | 0.0235  | -0.0229 | 0.0088  | 0.2981  | -0.2892 |
| C15 | -0.0292 | -0.0310 | 0.0364  | 0.0018  | 0.0656  | -0.0638 | 0.0011  | 0.0416  | -0.0405 | 0.0145  | 0.5271  | -0.5126 |
| C16 | -0.0103 | -0.0081 | -0.0005 | -0.0022 | 0.0098  | -0.0120 | -0.0014 | 0.0062  | -0.0076 | -0.0177 | 0.0787  | -0.0964 |
| C17 | -0.0234 | -0.0256 | -0.0074 | 0.0022  | 0.0160  | -0.0138 | 0.0014  | 0.0102  | -0.0088 | 0.0177  | 0.1286  | -0.1109 |
| C18 | -0.0226 | -0.0226 | -0.0080 | 0.0000  | 0.0145  | -0.0145 | 0.0000  | 0.0092  | -0.0092 | 0.0000  | 0.1165  | -0.1165 |
| C19 | -0.0241 | -0.0271 | -0.0104 | 0.0030  | 0.0137  | -0.0107 | 0.0019  | 0.0087  | -0.0068 | 0.0241  | 0.1101  | -0.0860 |
| C20 | -0.0220 | -0.0250 | -0.0089 | 0.0030  | 0.0132  | -0.0102 | 0.0019  | 0.0084  | -0.0065 | 0.0241  | 0.1061  | -0.0820 |
| C21 | -0.0169 | -0.0208 | 0.0077  | 0.0039  | 0.0246  | -0.0207 | 0.0025  | 0.0156  | -0.0131 | 0.0313  | 0.1976  | -0.1663 |
| C22 | 0.0274  | 0.0199  | 0.0326  | 0.0075  | 0.0052  | 0.0023  | 0.0048  | 0.0033  | 0.0015  | 0.0603  | 0.0418  | 0.0185  |
| C23 | -0.0001 | -0.0371 | -0.0021 | 0.0370  | -0.0020 | 0.0390  | 0.0235  | -0.0013 | 0.0248  | 0.2973  | -0.0161 | 0.3133  |
| C24 | 0.0177  | -0.0124 | 0.0189  | 0.0301  | 0.0012  | 0.0289  | 0.0191  | 0.0008  | 0.0183  | 0.2418  | 0.0096  | 0.2322  |
| C25 | 0.0766  | 0.0330  | 0.0793  | 0.0436  | 0.0028  | 0.0408  | 0.0277  | 0.0018  | 0.0259  | 0.3503  | 0.0225  | 0.3278  |
| C26 | 0.0961  | 0.0524  | 0.1017  | 0.0438  | 0.0056  | 0.0382  | 0.0278  | 0.0036  | 0.0242  | 0.3519  | 0.0450  | 0.3069  |
| C27 | -0.0222 | -0.0794 | -0.0180 | 0.0572  | 0.0042  | 0.0530  | 0.0363  | 0.0027  | 0.0336  | 0.4596  | 0.0337  | 0.4258  |
| C28 | -0.0054 | -0.0516 | -0.0010 | 0.0462  | 0.0044  | 0.0418  | 0.0293  | 0.0028  | 0.0265  | 0.3712  | 0.0354  | 0.3358  |
| C29 | 0.0345  | -0.0911 | 0.0348  | 0.1255  | 0.0004  | 0.1251  | 0.0797  | 0.0003  | 0.0794  | 1.0083  | 0.0032  | 1.0051  |
| C30 | 0.0016  | -0.0674 | 0.0058  | 0.0690  | 0.0042  | 0.0648  | 0.0438  | 0.0027  | 0.0411  | 0.5544  | 0.0337  | 0.5206  |
| C31 | 0.1164  | -0.0030 | 0.1199  | 0.1194  | 0.0035  | 0.1159  | 0.0758  | 0.0022  | 0.0736  | 0.9593  | 0.0281  | 0.9312  |

Table S3. As Table S1 but for the neutral form of CDIQ inhibitor.

| atom | q(N)    | q(N+1)  | q(N-1)  | $f_A^+$ | $f_A^-$ | $f_A^2$ | $s_A^+$ | $s_A^-$ | $\Delta s_k$ | $\omega_A^+$ | $\omega_A^-$ | $\Delta \omega_i$ |
|------|---------|---------|---------|---------|---------|---------|---------|---------|--------------|--------------|--------------|-------------------|
| O1   | -0.1966 | -0.2323 | -0.1901 | 0.0357  | 0.0065  | 0.0291  | 0.0196  | 0.0036  | 0.0160       | 0.1463       | 0.0266       | 0.1197            |
| N1   | -0.2223 | -0.2297 | -0.1826 | 0.0074  | 0.0397  | -0.0323 | 0.0041  | 0.0218  | -0.0177      | 0.0303       | 0.1627       | -0.1324           |
| N2   | -0.0009 | 0.0009  | 0.0220  | -0.0018 | 0.0229  | -0.0247 | -0.0010 | 0.0126  | -0.0135      | -0.0074      | 0.0938       | -0.1012           |
| N3   | -0.1870 | -0.2902 | -0.1817 | 0.1033  | 0.0052  | 0.0980  | 0.0566  | 0.0029  | 0.0538       | 0.4233       | 0.0213       | 0.4020            |
| C1   | 0.0745  | 0.0724  | 0.1381  | 0.0021  | 0.0635  | -0.0614 | 0.0012  | 0.0348  | -0.0337      | 0.0086       | 0.2602       | -0.2516           |

|     |         |         |         |         |         |         |         |         |         |         |         |         |
|-----|---------|---------|---------|---------|---------|---------|---------|---------|---------|---------|---------|---------|
| C2  | -0.0009 | -0.0064 | 0.0773  | 0.0055  | 0.0782  | -0.0728 | 0.0030  | 0.0429  | -0.0399 | 0.0225  | 0.3205  | -0.2979 |
| C3  | 0.0166  | 0.0163  | 0.0990  | 0.0003  | 0.0824  | -0.0821 | 0.0002  | 0.0452  | -0.0450 | 0.0012  | 0.3377  | -0.3364 |
| C4  | -0.0029 | -0.0012 | 0.0051  | -0.0017 | 0.0079  | -0.0097 | -0.0009 | 0.0043  | -0.0053 | -0.0070 | 0.0324  | -0.0393 |
| C5  | -0.0346 | -0.0362 | -0.0146 | 0.0016  | 0.0201  | -0.0185 | 0.0009  | 0.0110  | -0.0101 | 0.0066  | 0.0824  | -0.0758 |
| C6  | -0.0346 | -0.0363 | -0.0127 | 0.0017  | 0.0219  | -0.0202 | 0.0009  | 0.0120  | -0.0111 | 0.0070  | 0.0897  | -0.0828 |
| C7  | -0.0375 | -0.0405 | -0.0190 | 0.0030  | 0.0185  | -0.0155 | 0.0016  | 0.0101  | -0.0085 | 0.0123  | 0.0758  | -0.0635 |
| C8  | -0.0373 | -0.0404 | -0.0180 | 0.0031  | 0.0193  | -0.0162 | 0.0017  | 0.0106  | -0.0089 | 0.0127  | 0.0791  | -0.0664 |
| C9  | -0.0370 | -0.0407 | -0.0040 | 0.0038  | 0.0329  | -0.0291 | 0.0021  | 0.0180  | -0.0160 | 0.0156  | 0.1348  | -0.1192 |
| C10 | -0.0103 | -0.0106 | 0.0158  | 0.0004  | 0.0260  | -0.0257 | 0.0002  | 0.0143  | -0.0140 | 0.0016  | 0.1065  | -0.1049 |
| C11 | -0.0476 | -0.0491 | -0.0134 | 0.0015  | 0.0342  | -0.0327 | 0.0008  | 0.0187  | -0.0179 | 0.0061  | 0.1401  | -0.1340 |
| C12 | -0.0506 | -0.0524 | -0.0142 | 0.0017  | 0.0365  | -0.0347 | 0.0009  | 0.0200  | -0.0191 | 0.0070  | 0.1496  | -0.1426 |
| C13 | -0.0462 | -0.0476 | -0.0212 | 0.0015  | 0.0250  | -0.0235 | 0.0008  | 0.0137  | -0.0129 | 0.0061  | 0.1024  | -0.0963 |
| C14 | -0.0463 | -0.0476 | -0.0191 | 0.0013  | 0.0271  | -0.0258 | 0.0007  | 0.0149  | -0.0141 | 0.0053  | 0.1111  | -0.1057 |
| C15 | -0.0486 | -0.0508 | 0.0034  | 0.0023  | 0.0519  | -0.0496 | 0.0013  | 0.0285  | -0.0272 | 0.0094  | 0.2127  | -0.2033 |
| C16 | -0.0091 | -0.0089 | -0.0012 | -0.0002 | 0.0079  | -0.0081 | -0.0001 | 0.0043  | -0.0044 | -0.0008 | 0.0324  | -0.0332 |
| C17 | -0.0300 | -0.0346 | -0.0107 | 0.0046  | 0.0193  | -0.0147 | 0.0025  | 0.0106  | -0.0081 | 0.0189  | 0.0791  | -0.0602 |
| C18 | -0.0275 | -0.0284 | -0.0113 | 0.0009  | 0.0162  | -0.0153 | 0.0005  | 0.0089  | -0.0084 | 0.0037  | 0.0664  | -0.0627 |
| C19 | -0.0417 | -0.0459 | -0.0283 | 0.0042  | 0.0135  | -0.0093 | 0.0023  | 0.0074  | -0.0051 | 0.0172  | 0.0553  | -0.0381 |
| C20 | -0.0402 | -0.0449 | -0.0269 | 0.0048  | 0.0132  | -0.0085 | 0.0026  | 0.0072  | -0.0046 | 0.0197  | 0.0541  | -0.0344 |
| C21 | 0.0243  | 0.0187  | 0.0445  | 0.0056  | 0.0202  | -0.0146 | 0.0031  | 0.0111  | -0.0080 | 0.0229  | 0.0828  | -0.0598 |
| C22 | -0.0173 | -0.0629 | -0.0187 | 0.0456  | -0.0014 | 0.0470  | 0.0250  | -0.0008 | 0.0258  | 0.1869  | -0.0057 | 0.1926  |
| C23 | -0.0068 | -0.0314 | -0.0054 | 0.0247  | 0.0013  | 0.0233  | 0.0135  | 0.0007  | 0.0128  | 0.1012  | 0.0053  | 0.0959  |
| C24 | 0.0275  | -0.0062 | 0.0309  | 0.0337  | 0.0034  | 0.0303  | 0.0185  | 0.0019  | 0.0166  | 0.1381  | 0.0139  | 0.1242  |
| C25 | 0.0722  | 0.0115  | 0.0799  | 0.0607  | 0.0077  | 0.0530  | 0.0333  | 0.0042  | 0.0291  | 0.2487  | 0.0316  | 0.2172  |
| C26 | -0.0620 | -0.1171 | -0.0556 | 0.0551  | 0.0064  | 0.0487  | 0.0302  | 0.0035  | 0.0267  | 0.2258  | 0.0262  | 0.1996  |
| C27 | -0.0333 | -0.0857 | -0.0271 | 0.0525  | 0.0062  | 0.0463  | 0.0288  | 0.0034  | 0.0254  | 0.2151  | 0.0254  | 0.1897  |
| C28 | -0.0200 | -0.1246 | -0.0195 | 0.1046  | 0.0006  | 0.1040  | 0.0573  | 0.0003  | 0.0570  | 0.4286  | 0.0025  | 0.4262  |
| C29 | -0.0376 | -0.1165 | -0.0318 | 0.0789  | 0.0058  | 0.0731  | 0.0433  | 0.0032  | 0.0401  | 0.3233  | 0.0238  | 0.2996  |
| C30 | 0.0227  | -0.0666 | 0.0273  | 0.0894  | 0.0045  | 0.0848  | 0.0490  | 0.0025  | 0.0465  | 0.3664  | 0.0184  | 0.3479  |
| C31 | 0.0135  | 0.0046  | 0.0199  | 0.0089  | 0.0064  | 0.0025  | 0.0049  | 0.0035  | 0.0014  | 0.0365  | 0.0262  | 0.0102  |
| Cl1 | -0.0800 | -0.0867 | -0.0510 | 0.0068  | 0.0290  | -0.0222 | 0.0037  | 0.0159  | -0.0122 | 0.0279  | 0.1188  | -0.0910 |

Table S4. As Table S1 but for the protonated form of CDIQ inhibitor.

| atom | q(N)    | q(N+1)  | q(N-1)  | $f_A^+$ | $f_A^-$ | $f_A^2$ | $s_A^+$ | $s_A^-$ | $\Delta s_k$ | $\omega_A^+$ | $\omega_A^-$ | $\Delta\omega_A$ |
|------|---------|---------|---------|---------|---------|---------|---------|---------|--------------|--------------|--------------|------------------|
| o1   | -0.1539 | -0.1797 | -0.1461 | 0.0258  | 0.0078  | 0.0180  | 0.0153  | 0.0046  | 0.0107       | 0.2034       | 0.0615       | 0.1419           |
| N1   | 0.0053  | 0.0012  | 0.0241  | 0.0040  | 0.0189  | -0.0149 | 0.0024  | 0.0112  | -0.0089      | 0.0315       | 0.1490       | -0.1175          |
| N2   | 0.0285  | 0.0310  | 0.0464  | -0.0025 | 0.0179  | -0.0204 | -0.0015 | 0.0106  | -0.0121      | -0.0197      | 0.1411       | -0.1608          |
| N3   | 0.0431  | -0.0413 | 0.0464  | 0.0844  | 0.0033  | 0.0811  | 0.0501  | 0.0020  | 0.0482       | 0.6654       | 0.0260       | 0.6394           |

---

|     |         |         |         |         |        |         |         |        |         |         |        |         |
|-----|---------|---------|---------|---------|--------|---------|---------|--------|---------|---------|--------|---------|
| C1  | 0.1440  | 0.1424  | 0.1903  | 0.0017  | 0.0463 | -0.0446 | 0.0010  | 0.0275 | -0.0265 | 0.0134  | 0.3650 | -0.3516 |
| C2  | 0.0533  | 0.0489  | 0.1094  | 0.0044  | 0.0561 | -0.0517 | 0.0026  | 0.0333 | -0.0307 | 0.0347  | 0.4423 | -0.4076 |
| C3  | 0.0442  | 0.0444  | 0.1111  | -0.0002 | 0.0668 | -0.0670 | -0.0001 | 0.0397 | -0.0398 | -0.0016 | 0.5267 | -0.5282 |
| C4  | -0.0074 | -0.0056 | 0.0003  | -0.0017 | 0.0076 | -0.0093 | -0.0010 | 0.0045 | -0.0055 | -0.0134 | 0.0599 | -0.0733 |
| C5  | -0.0278 | -0.0283 | -0.0158 | 0.0005  | 0.0120 | -0.0115 | 0.0003  | 0.0071 | -0.0068 | 0.0039  | 0.0946 | -0.0907 |
| C6  | -0.0270 | -0.0286 | -0.0079 | 0.0016  | 0.0191 | -0.0175 | 0.0010  | 0.0113 | -0.0104 | 0.0126  | 0.1506 | -0.1380 |
| C7  | -0.0285 | -0.0308 | -0.0097 | 0.0023  | 0.0189 | -0.0166 | 0.0014  | 0.0112 | -0.0099 | 0.0181  | 0.1490 | -0.1309 |
| C8  | -0.0284 | -0.0308 | -0.0134 | 0.0024  | 0.0150 | -0.0126 | 0.0014  | 0.0089 | -0.0075 | 0.0189  | 0.1183 | -0.0993 |
| C9  | -0.0239 | -0.0267 | 0.0016  | 0.0027  | 0.0256 | -0.0229 | 0.0016  | 0.0152 | -0.0136 | 0.0213  | 0.2018 | -0.1805 |
| C10 | -0.0067 | -0.0068 | 0.0457  | 0.0001  | 0.0524 | -0.0523 | 0.0001  | 0.0311 | -0.0311 | 0.0008  | 0.4131 | -0.4123 |
| C11 | -0.0331 | -0.0341 | 0.0078  | 0.0010  | 0.0409 | -0.0399 | 0.0006  | 0.0243 | -0.0237 | 0.0079  | 0.3225 | -0.3146 |
| C12 | -0.0343 | -0.0356 | 0.0108  | 0.0012  | 0.0451 | -0.0439 | 0.0007  | 0.0268 | -0.0261 | 0.0095  | 0.3556 | -0.3461 |
| C13 | -0.0315 | -0.0326 | 0.0089  | 0.0010  | 0.0405 | -0.0395 | 0.0006  | 0.0241 | -0.0235 | 0.0079  | 0.3193 | -0.3114 |
| C14 | -0.0314 | -0.0326 | 0.0057  | 0.0011  | 0.0372 | -0.0361 | 0.0007  | 0.0221 | -0.0214 | 0.0087  | 0.2933 | -0.2846 |
| C15 | -0.0282 | -0.0299 | 0.0480  | 0.0017  | 0.0762 | -0.0745 | 0.0010  | 0.0453 | -0.0443 | 0.0134  | 0.6008 | -0.5874 |
| C16 | -0.0082 | -0.0057 | 0.0000  | -0.0025 | 0.0082 | -0.0107 | -0.0015 | 0.0049 | -0.0064 | -0.0197 | 0.0646 | -0.0844 |
| C17 | -0.0131 | -0.0155 | 0.0002  | 0.0024  | 0.0134 | -0.0110 | 0.0014  | 0.0080 | -0.0065 | 0.0189  | 0.1056 | -0.0867 |
| C18 | -0.0133 | -0.0134 | -0.0013 | 0.0001  | 0.0120 | -0.0119 | 0.0001  | 0.0071 | -0.0071 | 0.0008  | 0.0946 | -0.0938 |
| C19 | -0.0278 | -0.0306 | -0.0153 | 0.0028  | 0.0125 | -0.0097 | 0.0017  | 0.0074 | -0.0058 | 0.0221  | 0.0986 | -0.0765 |
| C20 | -0.0265 | -0.0296 | -0.0141 | 0.0031  | 0.0124 | -0.0093 | 0.0018  | 0.0074 | -0.0055 | 0.0244  | 0.0978 | -0.0733 |
| C21 | 0.0403  | 0.0371  | 0.0572  | 0.0032  | 0.0169 | -0.0137 | 0.0019  | 0.0100 | -0.0081 | 0.0252  | 0.1332 | -0.1080 |
| C22 | 0.0278  | 0.0203  | 0.0333  | 0.0075  | 0.0055 | 0.0020  | 0.0045  | 0.0033 | 0.0012  | 0.0591  | 0.0434 | 0.0158  |
| C23 | -0.0001 | -0.0366 | 0.0010  | 0.0365  | 0.0011 | 0.0354  | 0.0217  | 0.0007 | 0.0210  | 0.2878  | 0.0087 | 0.2791  |
| C24 | 0.0175  | -0.0121 | 0.0194  | 0.0296  | 0.0019 | 0.0277  | 0.0176  | 0.0011 | 0.0165  | 0.2334  | 0.0150 | 0.2184  |
| C25 | 0.0769  | 0.0336  | 0.0806  | 0.0433  | 0.0036 | 0.0397  | 0.0257  | 0.0021 | 0.0236  | 0.3414  | 0.0284 | 0.3130  |
| C26 | 0.0965  | 0.0528  | 0.1050  | 0.0437  | 0.0085 | 0.0352  | 0.0260  | 0.0050 | 0.0209  | 0.3445  | 0.0670 | 0.2775  |
| C27 | -0.0214 | -0.0783 | -0.0144 | 0.0569  | 0.0070 | 0.0499  | 0.0338  | 0.0042 | 0.0296  | 0.4486  | 0.0552 | 0.3934  |
| C28 | -0.0045 | -0.0509 | 0.0015  | 0.0464  | 0.0061 | 0.0403  | 0.0276  | 0.0036 | 0.0239  | 0.3658  | 0.0481 | 0.3177  |
| C29 | 0.0353  | -0.0898 | 0.0366  | 0.1251  | 0.0013 | 0.1238  | 0.0743  | 0.0008 | 0.0735  | 0.9863  | 0.0102 | 0.9761  |
| C30 | 0.0024  | -0.0667 | 0.0078  | 0.0691  | 0.0054 | 0.0637  | 0.0410  | 0.0032 | 0.0378  | 0.5448  | 0.0426 | 0.5022  |
| C31 | 0.1169  | -0.0023 | 0.1213  | 0.1192  | 0.0044 | 0.1148  | 0.0708  | 0.0026 | 0.0682  | 0.9398  | 0.0347 | 0.9051  |
| C11 | -0.0547 | -0.0592 | -0.0246 | 0.0045  | 0.0301 | -0.0256 | 0.0027  | 0.0179 | -0.0152 | 0.0355  | 0.2373 | -0.2018 |

---
